# Supplementary material for: Excess mortality and undertreatment in elderly lung cancer patients: treatment nihilism in the modern era?
Source: PubMed Central journal article supplement — ERJ Open Res. 2021 May 24;7(2):00393-2020. doi: 10.1183/23120541.00393-2020 (PMC8141829; doi:10.1183/23120541.00393-2020), 2021-05-24
Supplement: 00393-2020.SUPPLEMENT.pdf [file 00393-2020.SUPPLEMENT.pdf]

**Supplemental Table 1. VLCR definitions of comorbidity**

| <b>Disease</b>          | <b>Definition</b>                                                                                                                                                                           |
|-------------------------|---------------------------------------------------------------------------------------------------------------------------------------------------------------------------------------------|
| Diabetes                | Patients receiving oral hypoglycaemic drugs or insulin                                                                                                                                      |
| Renal insufficiency     | Creatinine of greater than 200umol/L or renal replacement therapy                                                                                                                           |
| Myocardial infarction   | Non-ST elevation myocardial infarction (NSTEMI) or an acute cardiac event requiring coronary intervention (including coronary artery stents, angioplasty, coronary artery bypass grafting). |
| Respiratory comorbidity | respiratory illness where spirometry demonstrates a forced expiratory volume in 1 second (FEV1) of less than 66% predicted                                                                  |
| Neoplastic comorbidity  | Patients who have recently been diagnosed or have a past history of cancer other than lung cancer but excluding cutaneous basal or squamous cell carcinoma.                                 |
